# Supplementary material for: Effects of Age and Popularity of Sport on Differences among Wrestlers’ Parental Support: An Exploratory Study
Source: J Funct Morphol Kinesiol. 2023 May 15;8(2):65. doi: 10.3390/jfmk8020065 (PMC10204366; doi:10.3390/jfmk8020065)
Supplement: Supplementary file 1 [file jfmk-08-00065-s001.zip › supplementary materials-data.xlsx]

## Sheet: Sheet1
Age	Age category	capital/other	Item 1	Item 2	Item 3	Item 4	Item 5	Item 6	Item 7	Item 8	Item 9	Item 10	Item 11	Item 12	Item 13	Item 14	Item 15	Item 16	Item 17	Item 18	Item 19	Item 20	Item 21	Item 22	Item 23	Item 24	Item 25
15.9	cadets	capital city	5	5	4	3	2	4	5	5	5	5	4	3	2	4	3	4	5	3	5	5	2	4	5	4	1
16	cadets	capital city	5	5	1	1	4	4	5	5	4	5	3	5	2	4	3	5	3	4	3	1	2	4	4	4	5
15.1	cadets	capital city	5	5	3	3	5	5	5	5	5	4	3	3	5	5	5	5	5	5	4	4	5	5	5	4	2
12	pre-cometitors	capital city	5	5	4	2	5	5	5	5	5	3	5	4	4	5	5	5	1	5	5	4	5	5	5	5	1
16	cadets	capital city	4	5	5	5	5	5	5	5	5	5	5	5	5	5	5	5	5	5	5	5	5	5	5	5	5
16.5	cadets	capital city	5	5	4	2	5	5	4	5	3	5	3	5	5	5	1	5	5	5	5	5	5	5	1	5	5
12.1	pre-cometitors	capital city	5	5	4	2	5	5	5	5	5	5	2	3	5	4	5	5	5	3	5	2	5	4	5	4	5
12.7	pre-cometitors	capital city	5	5	4	3	4	5	4	4	5	5	3	2	5	3	5	5	5	4	5	3	5	3	5	5	4
11.6	pre-cometitors	capital city	5	5	3	4	3	5	5	5	5	4	4	2	2	4	5	4	5	5	4	3	4	3	5	4	4
11.6	pre-cometitors	capital city	5	5	2	2	5	5	5	5	5	5	4	3	5	5	5	5	4	4	4	3	5	5	5	5	5
12.7	pre-cometitors	capital city	5	4	4	3	5	5	5	5	5	4	5	4	4	5	5	3	3	3	5	2	4	5	5	5	4
11	pre-cometitors	capital city	5	5	4	3	5	5	4	5	5	5	5	4	5	5	4	5	5	4	5	4	5	4	5	4	5
16.1	cadets	capital city	5	5	2	1	2	5	5	5	5	5	1	2	3	5	5	5	5	5	5	1	5	5	5	4	3
16.3	cadets	capital city	5	5	5	3	5	5	5	5	5	5	5	5	3	5	5	5	5	5	5	5	5	5	5	5	1
16.2	cadets	capital city	5	5	2	3	5	5	5	5	5	5	5	5	3	5	5	5	5	5	5	3	4	4	4	5	4
14.1	boys	capital city	5	5	4	2	5	5	5	5	5	5	5	2	5	4	5	5	5	4	4	1	4	4	4	5	5
13.1	boys	capital city	5	5	5	5	5	5	5	5	5	5	5	5	4	5	5	5	5	5	5	5	5	5	5	5	5
13.11	boys	capital city	3	4	2	4	4	4	5	4	5	5	5	5	4	5	5	5	4	4	5	4	4	4	5	4	4
13.1	boys	capital city	1	4	1	3	1	5	5	2	1	4	4	5	1	3	5	3	1	3	3	1	1	1	1	2	5
15.1	boys	capital city	5	5	2	3	5	5	5	5	5	5	5	3	3	4	5	5	5	5	5	3	5	4	5	5	5
12.8	pre-cometitors	capital city	5	5	1	3	5	5	5	5	1	5	5	3	5	5	5	5	1	5	3	3	5	5	5	5	5
12.8	pre-cometitors	capital city	5	5	3	5	5	5	5	5	5	5	5	5	5	5	5	5	5	5	5	4	5	5	5	5	5
15.8	boys	capital city	5	5	5	3	5	5	5	5	5	5	5	5	4	5	5	5	5	5	5	5	4	5	5	4	5
13	boys	capital city	5	5	5	3	4	5	5	5	5	5	5	3	3	5	5	5	5	5	5	3	5	5	5	5	5
14.9	boys	capital city	5	5	3	4	5	5	5	4	5	4	5	3	5	4	5	4	5	4	5	4	4	5	5	4	5
13.7	boys	capital city	5	5	4	5	5	5	5	5	5	5	5	5	5	5	5	5	5	5	5	5	5	5	5	5	5
13.2	boys	capital city	5	3	3	4	5	5	5	4	5	5	3	4	5	4	5	4	5	1	3	2	4	3	5	5	3
14.3	boys	capital city	5	5	5	3	5	5	5	5	5	5	5	3	5	4	5	5	5	2	5	5	5	3	5	5	5
11	pre-cometitors	capital city	5	5	3	4	4	5	4	5	5	5	3	4	4	5	5	5	4	3	3	4	5	4	5	4	1
12.7	pre-cometitors	capital city	5	5	3	3	5	5	5	5	5	5	5	4	5	5	5	5	5	3	5	5	5	4	5	5	5
11.5	pre-cometitors	capital city	5	5	5	4	5	5	5	5	5	5	5	4	5	3	5	5	5	5	5	3	5	5	2	5	5
12.11	pre-cometitors	capital city	5	5	2	4	5	5	5	5	5	5	5	5	5	5	5	5	5	5	5	5	5	5	5	5	5
12.5	pre-cometitors	capital city	5	4	5	4	5	5	4	5	5	5	5	5	4	5	5	4	5	5	5	3	5	5	1	5	5
14.9	boys	capital city	5	4	3	5	4	4	4	4	4	4	2	5	2	4	5	4	4	3	4	2	2	3	3	3	4
15.2	boys	capital city	5	4	3	3	5	4	4	5	5	5	5	5	3	5	5	4	1	4	5	3	3	5	5	4	5
13.6	boys	capital city	5	4	5	5	4	5	5	5	5	4	4	4	3	4	5	4	4	4	5	4	4	4	5	5	4
14.1	boys	capital city	5	5	5	5	5	5	5	5	5	5	5	5	5	5	5	5	3	5	3	5	4	5	4	4	5
14.6	boys	capital city	5	5	3	5	5	5	5	5	5	5	5	4	3	5	5	5	5	5	5	5	4	5	5	5	5
14.11	boys	capital city	5	5	5	5	5	5	5	5	5	5	5	5	5	5	5	5	5	5	5	5	5	5	5	5	1
15.2	boys	capital city	5	5	3	4	5	5	5	5	5	5	5	5	3	5	5	5	4	4	5	5	4	4	5	5	3
16.2	cadets	capital city	5	5	5	5	5	5	5	5	5	5	5	5	5	5	5	5	5	5	5	5	5	5	5	5	5
11	pre-cometitors	capital city	5	5	3	5	3	5	5	5	5	5	5	5	5	5	4	5	5	3	5	5	4	4	1	5	5
11.8	pre-cometitors	capital city	5	5	4	5	5	5	5	5	5	5	5	5	5	5	5	5	5	5	5	5	5	5	1	5	5
12.8	pre-cometitors	capital city	5	3	4	5	2	4	5	5	5	4	3	3	2	3	4	4	5	3	1	2	3	2	3	3	4
11.8	pre-cometitors	capital city	5	5	4	4	5	5	5	5	5	5	2	5	5	5	5	5	1	5	5	4	5	5	1	5	5
12.8	pre-cometitors	capital city	5	5	3	3	5	5	5	5	5	5	3	4	4	5	3	4	5	5	5	4	3	3	4	4	3
15.1	boys	capital city	5	5	3	3	5	5	5	5	5	5	3	4	5	5	5	5	5	5	4	3	5	5	5	5	1
11.8	pre-cometitors	capital city	5	5	5	2	3	5	4	5	5	5	4	1	5	5	5	5	5	5	5	2	5	5	5	5	5
11.4	pre-cometitors	capital city	5	5	3	5	5	5	5	5	5	5	5	4	5	5	5	5	5	2	5	3	5	5	5	5	5
12.7	pre-cometitors	capital city	5	5	5	4	5	5	4	4	5	5	5	3	5	3	5	5	4	4	1	5	3	3	1	5	5
14.6	boys	capital city	3	4	3	2	3	5	5	5	5	4	4	3	5	5	5	3	2	2	3	3	3	3	4	3	3
13.5	boys	capital city	5	5	3	3	5	5	5	5	5	5	3	5	5	5	5	5	5	4	4	3	4	5	5	5	5
17.2	cadets	capital city	5	5	3	4	3	5	5	5	5	5	5	3	1	4	3	5	5	5	5	4	2	2	1	3	4
17.1	cadets	capital city	5	5	3	4	5	5	5	5	5	5	5	5	5	5	5	5	5	5	5	5	5	5	1	5	5
16.9	cadets	capital city	5	5	4	4	5	5	5	5	5	5	4	5	5	5	5	5	5	5	5	4	5	4	4	5	5
16.3	cadets	capital city	5	5	5	5	5	5	5	5	5	5	5	2	5	5	5	5	5	5	5	3	5	5	5	5	5
16.6	cadets	capital city	3	3	3	4	4	5	5	5	5	4	5	5	5	4	5	4	5	4	4	2	3	4	3	5	5
17.1	cadets	capital city	4	4	3	2	4	4	4	4	4	5	4	3	5	4	4	4	3	5	4	5	5	5	4	4	5
17.1	cadets	capital city	5	5	5	5	4	5	5	5	5	5	4	5	5	5	5	5	3	5	5	3	4	5	5	5	5
16.9	cadets	capital city	5	5	5	5	5	5	5	5	5	5	3	5	5	5	5	5	5	4	5	5	5	5	5	5	5
14.2	boys	capital city	5	5	3	3	5	5	5	5	5	5	5	3	5	5	5	5	5	5	5	5	5	5	5	5	5
15.11	boys	capital city	5	5	3	3	5	5	5	5	1	5	1	3	5	5	5	5	5	5	5	5	5	5	1	1	3
15.4	boys	capital city	5	5	3	4	5	4	5	5	5	5	5	4	5	5	5	5	5	5	5	4	5	5	4	5	5
15.6	boys	capital city	5	5	3	2	5	4	5	5	5	5	5	5	5	5	5	5	1	4	5	1	5	5	5	5	5
15.1	boys	capital city	2	3	2	4	1	4	4	3	3	3	3	2	1	2	4	3	1	4	5	1	1	1	1	2	3
15.8	boys	capital city	5	5	2	2	5	5	5	5	5	5	5	3	3	5	5	5	5	5	5	2	2	5	4	5	5
15.5	boys	capital city	3	5	4	4	2	2	3	3	3	3	4	5	3	4	3	4	5	3	4	3	2	3	4	3	4
15.5	boys	capital city	5	5	3	3	5	5	5	5	5	5	4	3	4	5	5	4	4	4	5	3	5	5	5	5	5
15.2	boys	capital city	4	3	4	4	4	5	5	5	4	4	1	3	4	5	5	4	2	3	5	1	3	3	5	2	1
14.8	boys	capital city	5	5	3	2	4	5	5	5	5	5	3	2	3	5	5	5	5	4	5	3	5	4	5	5	4
15.4	boys	capital city	5	5	5	5	5	5	5	5	5	5	5	5	5	5	5	5	5	5	5	5	5	5	5	5	5
15	boys	capital city	5	5	4	4	5	5	5	5	5	5	4	4	5	5	4	5	4	5	5	4	5	5	5	5	5
14.5	boys	capital city	5	5	5	4	5	5	5	5	5	5	5	5	5	5	4	5	5	2	5	5	5	5	1	5	5
13.8	boys	capital city	4	3	3	4	4	4	4	4	3	4	3	4	4	5	5	5	3	2	3	4	4	4	4	4	1
13.1	boys	capital city	5	5	3	2	5	5	5	5	5	5	3	5	5	5	5	5	5	5	5	5	5	5	5	5	5
13.1	boys	capital city	4	4	3	3	4	4	5	4	4	4	4	4	4	4	4	4	4	2	4	4	4	4	4	4	4
13.11	boys	capital city	3	5	5	1	5	5	5	5	5	5	4	3	5	5	5	5	5	5	5	5	5	5	3	5	5
16.6	cadets	capital city	5	5	5	5	5	5	5	5	5	5	1	4	5	2	5	5	5	5	5	3	3	3	5	5	5
17.7	cadets	capital city	5	5	3	3	4	4	5	5	5	5	4	5	5	4	4	4	5	4	4	3	4	4	4	4	5
16.1	cadets	capital city	5	5	5	3	4	5	5	5	5	5	5	3	2	5	5	5	3	5	5	3	5	5	5	4	4
17.5	cadets	capital city	5	5	5	4	4	4	5	5	5	5	4	5	4	5	5	5	5	4	5	4	4	3	5	5	5
16,4	cadets	capital city	5	5	3	5	5	5	5	5	5	5	4	5	5	5	5	5	4	5	5	5	5	5	1	5	1
16,3	cadets	capital city	5	5	3	5	5	5	5	5	5	5	5	5	5	5	5	5	5	5	5	4	5	5	1	5	5
16,2	cadets	capital city	4	4	1	1	5	5	5	5	5	5	3	4	2	4	5	5	2	5	3	1	5	3	3	5	4
15,10	boys	capital city	3	3	3	1	4	5	5	4	4	5	4	4	1	4	5	3	3	3	5	1	1	3	4	3	5
16,1	cadets	capital city	5	5	5	5	4	4	5	5	5	5	5	5	5	4	4	4	4	4	5	4	4	3	4	3	3
15,11	boys	capital city	5	5	3	2	5	5	5	5	5	5	3	5	5	4	5	3	4	3	5	3	4	5	3	4	5
15,11	boys	capital city	5	5	5	5	5	5	5	5	5	5	5	5	5	5	5	5	5	5	5	5	5	5	5	5	5
15	boys	capital city	5	5	3	3	3	5	5	5	4	5	4	5	3	5	5	4	4	3	5	2	2	3	5	4	4
14.11	boys	capital city	5	5	5	1	1	5	5	5	5	5	5	5	1	5	5	5	5	5	5	1	1	5	1	5	5
16.4	cadets	capital city	5	5	3	4	5	5	5	5	5	5	3	5	5	5	5	5	5	5	4	4	5	5	5	5	3
17.1	cadets	capital city	5	5	4	5	3	4	5	5	5	5	5	5	2	5	5	5	5	5	5	3	5	5	5	4	5
16.4	cadets	capital city	5	5	3	4	5	5	5	5	5	5	3	5	5	5	5	5	5	5	4	4	5	5	5	5	3
13.6	boys	other cities	3	3	5	1	2	5	5	3	3	3	3	2	2	4	2	4	2	3	5	2	3	3	5	1	5
13.8	boys	other cities	4	4	3	2		3	5	5	5	5	5	5	5	5	5	5	4	4	4	4	4	4	4	4	4
13.3	boys	other cities	4	3	1	2	4	4	4	4	3	4	4	2	2	4	5	4	4	3	4	2	3	4	4	3	4
11.6	pre-cometitors	other cities	4	5	3	3	5	5	5	5	5	5	3	4	5	5	5	5	5	4	3	4	5	5	5	5	4
14.1	boys	other cities	5	5	2	1	4	5	5	5	3	4	1	4	4	4	5	5	3	3	4	1	1	5	4	4	4
11	pre-cometitors	other cities	4	1	3	5	4	4	5	5	5	4	3	5	5	5	4	4	4	4	1	3	3	5	5	5	5
12	pre-cometitors	other cities	2	4	1	3	3	5	4	4	4	2	1	5	5	5	3	1	5	1	5	5	5	5	5	5	2
11,6	pre-cometitors	other cities	5	5	5	5	5	5	5	5	5	5	5	5	4	5	5	5	5	5	5	5	5	5	5	5	5
13.11	boys	other cities	5	5	2	5	5	5	5	5	5	5	2	5	5	5	5	5	5	3	3	5	5	5	4	5	5
12	pre-cometitors	other cities	4	4	3	3	4	5	5	5	5	5	3	4	4	4	5	5	4	3	5	3	4	4	5	4	4
11.6	pre-cometitors	other cities	5	5	4	4	5	5	5	5	5	5	5	5	5	5	5	5	5	5	5	5	5	5	1	5	5
12.2	pre-cometitors	other cities	5	5	5	5	3	5	5	5	5	5	1	4	4	4	3	4	5	5	5	3	3		5	5	5
13	boys	other cities	1	3	2	1	2	5	5	3	3	2	1	1	1	5	5	5	5	5	5	1	5	5	5	5	5
12	pre-cometitors	other cities	5	5	5	5	5	5	5	5	5	5	5	3	5	1	3	5	5	5	5	5	5	3	5	5	5
12.7	pre-cometitors	other cities	5	5	4	5	5	5	5	5	5	5	4	5	5	5	5	5	5	5	5	5	5	5	4	5	5
13.4	boys	other cities	5	5	5	5	3	5	5	5	5	5	5	5	5	5	5	5	4	5	5	5	5	5	5	5	5
12	pre-cometitors	other cities	5	5	4	3	5	5	5	5	5	5	3	5	3	4	5	5	5	4	5	4	5	5	5	5	4
12.1	pre-cometitors	other cities	5	5	3	4	5	5	5	5	5	5	3	5	5	5	5	5	5	4	5	4	5	5	5	5	5
14	boys	other cities	5	5	4	3	3	5	5	5	5	5	5	5	4	4	5	4	4	4	4	4	4	4	4	4	4
14.5	boys	other cities	5	5	4	3	2	4	4	5	5	5	5	3	1	4	3	5	5	3	1	3	5	4	4	4	1
16	cadets	other cities	5	5	4	3	4	5	5	5	5	5	4	3	3	4	5	5	5	4	4	4	4	5	4	4	5
14.6	boys	other cities	4	3	1	1	4	5	4	4	4	3	1	1	3	3	4	4	4	4	1	1	2	1	4	4	4
14.1	boys	other cities	5	5	5	5	5	5	5	5	5	5	5	5	5	5	5	5	5	5	5	5	5	5	5	5	5
11.5	pre-cometitors	other cities	1	5	5	5	5	5	5	5	5	5	5	4	4	5	5	5	5	5	5	4	5	5	5	5	5
11.3	pre-cometitors	other cities	5	5	1	3	5	5	5	5	5	5	3	1	1	5	5	5	3	3	5	5	5	5	5	5	5
13.1	boys	other cities	5	5	5	5	5	5	5	5	5	5	2	5	5	5	5	5	5	5	5	5	5	5	5	5	4
15.1	boys	other cities	5	5	5	5	5	5	4	5	4	5	5	4	4	5	4	5	4	4	5	4	5	5	5	5	1
15.1	boys	other cities	4	4	4	3	3	4	4	4	4	4	5	3	3	4	3	4	4	4	4	3	3	4	3	4	5
14.9	boys	other cities	5	5	3	4	5	5	5	5	5	5	3	5	3	5	3	5	3	2	2	5	4	5	5	5	5
17.9	cadets	other cities	5		3	1	2	5	5	5	4	3	3	2	2	4	4	4	3	2	3	3	3	3	3	3	3
17.6	cadets	other cities	4	5	4	3	4	5	5	5	5	5	3	4	5	5	3	5	5	5	5	4	4	4	4	5	3
16.11	cadets	other cities	4	4	4	4	4	4	3	4	4	5	5	4	4	4	3	5	5	5	5	4	4	5	5	4	1
16.4	cadets	other cities	5	5	5	5	5	5	5	5	5	5	5	5	5	4	5	5	5	5	5	5	4	5	5	5	1
16.3	cadets	other cities	5	5	5	5	5	5	5	5	5	5	5	5	5	5	5	5	5	5	5	5	5	5	5	5	5
17.5	cadets	other cities	5	5	5	5	5	5	5	5	5	5	5	5	5	5	5	5	5	5	5	5	5	5	5	5	5
12.8	pre-cometitors	other cities	5	5	4	5	5	5	5	5	4	5	4	2	3	5	5	4	4	4	4	5	4	5	3	4	5
13.1	boys	other cities	5	1	2	1	4	5	5	5	4	2	1	1	1	5	5	5	5	1	5	1	5	4	5	5	5
13.2	boys	other cities	5	5	3	2	5	5	4	4	4	5	5	4	2	5	5	4	3	4	4	3	4	4	5	5	4
12.7	pre-cometitors	other cities	5	4	3	2	2	4	5	5	4	4	4	2	1	4	5	5	5	3	4	4	4	5	3	3	1
11.11	pre-cometitors	other cities	5	5	3	3	4	5	5	5	5	5	5	5	5	5	5	5	5	5	5	5	5	5	5	5	5
14.4	boys	other cities	5	5	4	5	5	5	5	5	5	5	5	5	5	5	5	5	5	5	5	5	5	5	5	5	5
13.1	boys	other cities	3	4	5	4	5	5	5	5	2	3	3	4	2	4	4	3	1	3	5	5	5	5	1	5	4
11.1	pre-cometitors	other cities	5	5	5	5	5	5	5	5	5	5	3	1	1	5	5	5	5	4	4	4	4	4	4	4	4
12.11	pre-cometitors	other cities	5	5	3	1	5	5	5	5	3	3	3	3	5	5	4	5	3	3	3	3	4	5	5	5	3
17.1	cadets	other cities	4	4	2	3	3	4	4	4	4	4	2	3	3	3	4	5	4	3	2	2	3	4	4	4	5
12	pre-cometitors	other cities	5	5	5	3	4	5	5	5	5	5	3	5	3	5	5	5	5	5	5	5	5	5	5	5	3
12.6	pre-cometitors	other cities	5	5	3	4	5	5	5	5	5	5	4	5	5	5	5	4	5	5	5	5	5	5	1	5	5
12.7	pre-cometitors	other cities	5	5	1	3	5	5	5	5	5	5	4	3	4	5	5	5	5	3	4	2	4	5	1	5	5
13	boys	other cities	5	5	3	3	4	4	5	5	5	4	4	5	5	5	4	4	4	4	5	4	4	5	4	4	4
12.9	pre-cometitors	other cities	5	5	5	3	5	5	5	5	5	5	5	4	5	5	5	5	5	5	1	2	4	5	5	4	5
15.11	boys	other cities	5	5	3	2	5	5	5	5	5	5	1	3	4	5	4	5	5	4	1	1	4	4	5	5	1
15.4	boys	other cities	5	5	3	5	5	2	1	5	3	5	5	2	4	5	4	5	5	5	5	5	5	5	5	5	5
16	cadets	other cities	3	5	3	5	5	5	5	5	1	5	5	3	2	5	5	5	1	5	5	5	3	5	5	5	5
16.9	cadets	other cities	5	5	5	5	5	5	5	5	5	5	5	5	5	5	5	5	5	5	5	5	5	5	5	5	5
12.1	pre-cometitors	other cities	5	5	4	4	5	5	5	5	5	5	4	5	3	4	5	5	5	5	5	4	4	5	5	5	5
14.2	boys	other cities	5	4	3	4	5	5	5	5	5	5	3	5	5	5	5	5	5	4	5	5	5	5	5	5	1
15.7	boys	other cities	5	5	5	5	5	5	5	5	5	5	5	4	5	5	5	5	5	4	5	5	5	5	5	5	5
11.1	pre-cometitors	other cities	5	5	4	5	5	5	5	5	5	5	5	5	5	5	5	5	5	5	5	5	5	5	5	5	5
11.9	pre-cometitors	other cities	5	5	5	5	5	5	5	5	5	5	5	5	5	5	4	5	5	4	5	5	5	5	5	5	5
12.5	pre-cometitors	other cities	5	4	3	3	1	5	4	5	4	4	3	5	4	1	1	2	4	4	1	1	4	3	1	4	4
11.3	pre-cometitors	other cities	5	5	5	3	5	5	5	5	5	5	5	5	5	5	5	5	5	5	5	3	5	5	5	5	5
11.9	pre-cometitors	other cities	5	5	5	4	3	5	5	5	5	5	2	4	3	5	5	4	5	3	3	5	5	5	4	4	5
12.1	pre-cometitors	other cities	4	5	4	3	5	5	5	5	5	5	5	5	5	5	5	5	5	5	5	4	4	4	4	5	5
12	pre-cometitors	other cities	5	5	4	5	5	5	4	4	5	5	1	5	4	4	4	4	4	4	4	4	4	4	4	4	4
13.6	boys	other cities	5	5	4	3	4	5	5	5	4	5	4	5	4	5	4	4	4	4	4	4	5	5	5	5	4
12	pre-cometitors	other cities	5	5	4	4	5	4	3	3	3	3	3	3	3	4	4	4	4	3	2	2	4	4	4	1	5
13.4	boys	other cities	5	5	5	5	5	5	5	5	5	5	5	5	5	5	5	5	5	5	5	5	5	5	1	5	5
13	boys	other cities	4	5	4	5	5	4	5	5	5	5	2	3	4	5	5	5	5	5	5	5	4	5	5	5	5
15.1	boys	other cities	5	5	3	2	5	5	5	5	4	5	5	5	4	5	4	4	5	4	5	3	5	5	5	5	1
14	boys	other cities	5	5	5	4	5	4	4	4	5	5	4	3	1	1	3	3	3	3	3	3	3	3	3	3	3
16.12	cadets	other cities	5	5	5	5	5	5	5	5	5	5	5	5	5	5	5	5	5	5	5	5	5	5	5	5	5
16.11	cadets	other cities	5	4	4	4	5	5	1	5	4	4	3	3	3	5	3	4	5	5	4	2	4	5	5	5	5
17.6	cadets	other cities	5	3	1	4	5	5	5	5	5	5	2	1	3	5	5	5	5	3	4	1	2	5	1	4	4
16.5	cadets	other cities	5	5	3	2	5	5	5	5	5	5	1	3	5	5	5	5	4	4	4	3	4	4	1	5	4
14.11	boys	other cities	4	5	3	4	3	5	5	5	5	5	5	2	3	5	5	4	4	3	3	3	4	1	4	5	1
13.1	boys	other cities	5	5	3	3	5	5	2	5	4	4	4	3	4	4	4	3	5	5	5	3	4	5	1	5	5
14.5	boys	other cities	5	5	5	2	5	5	5	5	4	5	5	4	1	5	5	5	5	3	5	1	3	5	5	5	5
16.11	cadets	other cities	5	5	5	2	5	5	5	5	4	5	5	5	5	5	4	5	5	4	5	5	5	5	3	5	5
16.1	cadets	other cities	5	5	5	5	5	5	5	5	5	5	5	5	4	5	5	4	5	4	5	4	5	5	5	5	5
